# Supplementary material
Source: HighWire-hosted journal article supplement (https://erj.ersjournals.com/content/55/3/1902341)
Supplement: inline-supplementary-material-1 [file inline-supplementary-material-1.pdf]

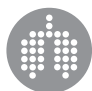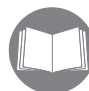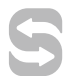

SHAREABLE PDF

# When it all comes down to pressure: right ventricular ejection fraction at cardiac catheterisation

Robert Naeije<sup>1</sup>, Manuel J. Richter<sup>2</sup>, Rebecca Vanderpool <sup>3</sup> and Khodr Tello<sup>2</sup>

**Affiliations:** <sup>1</sup>Free University of Brussels, Brussels, Belgium. <sup>2</sup>University of Giessen and Marburg Lung Center (UGMLC), member of the German Center for Lung Research (DZL) and of the Excellence Cluster Cardio-Pulmonary Institute (CPI), Giessen, Germany. <sup>3</sup>University of Arizona, Tucson, AZ, USA.

**Correspondence:** Robert Naeije, Dept of Physiology, Erasme Campus CP 604, 808 Lennik Road, B-1070 Brussels, Belgium. E-mail: rnaeije@ulb.ac.be

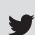

@ERSpublications

**Right ventricular ejection fraction can be calculated from a pressure curve** <http://bit.ly/2tjE37Q>

**Cite this article as:** Naeije R, Richter MJ, Vanderpool R, *et al.* When it all comes down to pressure: right ventricular ejection fraction at cardiac catheterisation. *Eur Respir J* 2020; 55: 1902341 [<https://doi.org/10.1183/13993003.02341-2019>].

This single-page version can be shared freely online.

In the present issue of the *European Respiratory Journal*, HEERDT *et al.* [1] report on the validation of right ventricularejection fraction (RVEF) calculated from a pressure curve at cardiac catheterisation. This is of great interest as right ventricular (RV) function is the main determinant of symptomatology and outcome in pulmonary hypertension [2], and RVEF accordingly adds significantly to risk stratification in these patients [3]. However, ejection fraction (EF) is a ratio of stroke volume (SV) to end-diastolic volume (EDV), with no pressure in the equation. So, how is it possible to calculate a volume ratio from pressure measurements?
